# Supplementary material for: Recent Progress in Antioxidant Active Substances from Marine Biota
Source: MDPI journal article supplement (doi:10.3390/antiox11030439), 2022-02-22
Supplement: s1 [file s1]

**Table S1.** Marine sources of natural substances with antioxidant activity

| Source                                                                                                                                                                                            | Location of harvesting                         | Extracts<br>Hydrolysates<br>Biomass                                                    | Biological activity<br>Potential applications                                         | Ref.         |
|---------------------------------------------------------------------------------------------------------------------------------------------------------------------------------------------------|------------------------------------------------|----------------------------------------------------------------------------------------|---------------------------------------------------------------------------------------|--------------|
| <b>Marine macro-organisms</b>                                                                                                                                                                     |                                                |                                                                                        |                                                                                       |              |
| <b>Seaweeds</b>                                                                                                                                                                                   |                                                |                                                                                        |                                                                                       |              |
| brown seaweeds                                                                                                                                                                                    |                                                |                                                                                        |                                                                                       |              |
| <i>Sargassum ilicifolium</i> ,<br><i>Sargassum angustifolium</i> ,<br><i>Sargassum filipendula</i>                                                                                                | Qeshm, Is-<br>land, Iran<br>Indonesia          | Fucoidan extracts                                                                      | Antioxidant<br>Antimicrobial<br>Nutraceutical industry                                | [40]<br>[41] |
| <i>Turbinaria decurrens</i> Bory                                                                                                                                                                  | Phillipins                                     | Fucoidan extracts                                                                      | Radicals scavenger<br>Cosmetics<br>Drug-resistant bacterial<br>infections<br>Diabetes | [42]         |
| <i>Toania atomaria</i> (Phaeophyta)                                                                                                                                                               | Rocky Bay,<br>Abu Qir,<br>Alexandria,<br>Egypt | Ethanol extract                                                                        | High antioxidant                                                                      | [43]         |
| <i>Caulerpa racemosa</i> var. <i>cylindracea</i>                                                                                                                                                  | Algeria coast                                  | Crude extracts con-<br>taining new bioactive<br>components                             | Antioxidant<br>Antibacterial                                                          | [44]         |
| Unexplored <i>Padina tetrastromatica</i> ,<br><i>Gracilaria tenuistipitata</i>                                                                                                                    | Bangladesh                                     | Various solvent ex-<br>tracts                                                          | Antioxidant                                                                           | [45]         |
| <i>Zonaria tournefortii</i>                                                                                                                                                                       | -                                              | Acilphloroglucinol<br>derivatives                                                      | Antioxidant                                                                           | [46]         |
| <i>Ecklonia maxima</i> blades                                                                                                                                                                     | -                                              | Hydrolysates<br>(celluclast-assisted;<br>viscozyme-assisted)                           | Antioxidant<br>Anti-inflammatory<br>Functional food                                   | [47]         |
| <i>Ecklonia maxima</i> stipe                                                                                                                                                                      | -                                              | Maceration extracts                                                                    | Very strong antioxidant<br>UV protector                                               | [29]         |
| <b>Red seaweeds</b>                                                                                                                                                                               |                                                |                                                                                        |                                                                                       |              |
| <i>Gracilaria bursapastoris</i>                                                                                                                                                                   | Nador laoon,<br>Maroco                         | Extracts<br>(ethanol)                                                                  | Antioxidant                                                                           | [48]         |
| <i>Asparagopsis armata</i> ,<br><i>Gracilaria gracilis</i> ,<br><i>Hypnea musciformis</i> ,<br><i>Laurencia obtusa</i> ,<br><i>Pterocladia capillacea</i> ,<br><i>Sphaerococcus cornopifolius</i> | north coast<br>of Tunisia                      | Extracts<br>(methanol)                                                                 | Radical scavenging                                                                    | [49]         |
| <b>Sea cucumbers</b>                                                                                                                                                                              |                                                |                                                                                        |                                                                                       |              |
| <i>Holothuria tubulosa</i> Gmelin 1791                                                                                                                                                            | Turkey seas                                    | Extracts<br>(acetonitrile/tri-<br>fluoroacetic acid,<br>methanol, wa-<br>ter/methanol) | Antioxidant                                                                           | [50]         |
| <i>Holothuria tubulosa</i> tegument                                                                                                                                                               | Bizerta                                        | Extracts<br>(chloroform-metha-<br>nol mixture)                                         | Antioxidant                                                                           | [51]         |

| Source                                                                                                                                                                                                      | Location of harvesting                | Extracts<br>Hydrolysates<br>Biomass                                                                                                                     | Biological activity<br>Potential applications                                                                                                                        | Ref. |
|-------------------------------------------------------------------------------------------------------------------------------------------------------------------------------------------------------------|---------------------------------------|---------------------------------------------------------------------------------------------------------------------------------------------------------|----------------------------------------------------------------------------------------------------------------------------------------------------------------------|------|
|                                                                                                                                                                                                             | lagoon,<br>northern Tu-<br>nisia      |                                                                                                                                                         |                                                                                                                                                                      |      |
| <i>Stichopus japonicas</i><br>( <i>S. japonicas</i> )                                                                                                                                                       | Red sea                               | Ultrasonic extracts<br>(water)                                                                                                                          | Antioxidant<br>Anti-melanogenic                                                                                                                                      | [52] |
| <i>Holothuria leucospilota</i>                                                                                                                                                                              | Indonesian<br>sea                     | Methanol extracts                                                                                                                                       | Highest Antioxidant<br>(among 16 from genus<br><i>Actinopyga</i> , <i>Bohadschia</i> , <i>Hol-<br/>othuria</i> , <i>Pseudocolochirus</i> ,<br>and <i>Stichopus</i> ) | [53] |
| <i>Holothuria atra</i>                                                                                                                                                                                      | Indonesian<br>sea                     | Extracts<br>(methanol)                                                                                                                                  | Highest antioxidant<br>(among 21 other cucum-<br>bers from Indonesian sea)                                                                                           | [54] |
| <i>S. japonicas</i>                                                                                                                                                                                         | -                                     | Hydrolysates<br>Enzymatic<br>(alcalase, $\alpha$ -chymo-<br>trypsin, fla-<br>vourzyme, kojizyme,<br>neutrase, papain,<br>pepsin, trypsin pro-<br>tamex) | Antioxidant<br>(against H <sub>2</sub> O <sub>2</sub> -induced<br>oxidative stress)                                                                                  | [55] |
| <b>Fishes</b>                                                                                                                                                                                               |                                       |                                                                                                                                                         |                                                                                                                                                                      |      |
| <i>Raja porosa</i> skate cartilage                                                                                                                                                                          | -                                     | Chondroitin sulphate<br>(CS) extracted                                                                                                                  | Antioxidant<br>(free radical scavenging<br>more effective than shark<br>CS)                                                                                          | [56] |
| <i>Sardina pilchardus</i> roe                                                                                                                                                                               | -                                     | Delivered lipids                                                                                                                                        | Antioxidant<br>Anti-inflammatory<br>(lipid liposomes)                                                                                                                | [58] |
| <b>Marine invertebrates</b>                                                                                                                                                                                 |                                       |                                                                                                                                                         |                                                                                                                                                                      |      |
| <b>Marine sponges</b>                                                                                                                                                                                       |                                       |                                                                                                                                                         |                                                                                                                                                                      |      |
| <i>Hyrtios erectus</i>                                                                                                                                                                                      | North Bay,<br>South<br>Andaman<br>Sea | Methanol extracts                                                                                                                                       | Antioxidant<br>Anti-inflammatory                                                                                                                                     | [62] |
| genus <i>Suberea</i> ,<br>family <i>Aplysinellidae</i>                                                                                                                                                      | -                                     | Produced bromoty-<br>rosine derivatives                                                                                                                 | Biological<br>Pharmacological                                                                                                                                        | [63] |
| <i>Diacarnus ardoukoba</i> associated<br><i>Streptomyces</i> sp. NMF6 strain                                                                                                                                | -                                     | Ethyl acetate extract                                                                                                                                   | Antioxidant<br>Anticancer<br>Antimicrobial<br>Antiviral                                                                                                              | [64] |
| <b>Soft corals</b>                                                                                                                                                                                          |                                       |                                                                                                                                                         |                                                                                                                                                                      |      |
| <i>Junceella juncea</i> <i>Cavernularia</i> sp.<br><i>white</i> <i>Menella</i> sp.<br><i>brown</i> <i>Menella</i> sp.<br><i>Virgularia</i> sp.<br><i>Sinularia compressa</i><br><i>Sinularia variabilis</i> | Persian Gulf                          | Maceration extracts<br>(methanol-ethyl<br>Acetate)                                                                                                      | Antioxidant<br>Anticancer                                                                                                                                            | [65] |

| Source                                                                                                                                                                                                                                                                | Location of harvesting                    | Extracts<br>Hydrolysates<br>Biomass                          | Biological activity<br>Potential applications          | Ref. |
|-----------------------------------------------------------------------------------------------------------------------------------------------------------------------------------------------------------------------------------------------------------------------|-------------------------------------------|--------------------------------------------------------------|--------------------------------------------------------|------|
| <i>Sinularia polydactyla</i>                                                                                                                                                                                                                                          |                                           |                                                              |                                                        |      |
| Soft corals                                                                                                                                                                                                                                                           | -                                         | Derived<br>Sinularin,<br>Dihydrosinularin                    | Antioxidant<br>Anti-cancer                             | [66] |
| <b>Crabs</b>                                                                                                                                                                                                                                                          |                                           |                                                              |                                                        |      |
| <i>Grapsus albolineatus</i>                                                                                                                                                                                                                                           | rocky shore                               | Hydrolysate<br>(Alcalase)<br>(bioactive peptides)            | Antioxidant<br>Antibacterial                           | [67] |
| <b>Molluscs</b>                                                                                                                                                                                                                                                       |                                           |                                                              |                                                        |      |
| <i>Tympanotonus fuscatus var radula</i> (Linnaeus)<br><i>Pachymelania aurita</i> (Muller)                                                                                                                                                                             | NigerDelta,<br>Nigeria                    | -                                                            | Antioxidant                                            | [70] |
| jellyfish <i>Acromitus flagellatus</i>                                                                                                                                                                                                                                | Indian ocean                              | Nematocysts<br>crude venom                                   | Antioxidant<br>(proteins, lipids, carotenoids)         | [71] |
| <b>Microorganisms</b>                                                                                                                                                                                                                                                 |                                           |                                                              |                                                        |      |
| <b>Microalgae</b>                                                                                                                                                                                                                                                     |                                           |                                                              |                                                        |      |
| <i>Dunaliella salina</i><br><i>Tetraselmis chuii</i><br><i>Isochrysis galbana</i>                                                                                                                                                                                     | clone<br>Tahiti                           | Extracts<br>(methanol)                                       | Antioxidant                                            | [74] |
| <i>Nannochloropsis oculata</i>                                                                                                                                                                                                                                        | -                                         | Extracts<br>(methanol)                                       | Antioxidant<br>Antimicrobial<br>Anticancer             | [75] |
| <i>Nannochloropsis gaditana</i>                                                                                                                                                                                                                                       | -                                         | Extracts<br>(methanol)                                       | Antioxidant<br>Anti-inflammatory<br>(in diabetic rats) | [76] |
| <i>Galdieria sulphuraria</i> ,<br><i>Ettlia carotinos</i> ,<br><i>Neochloris texensis</i> ,<br><i>Chlorella minutissima</i> ,<br><i>Stichococcus bacillaris</i> ,<br><i>Schizochytrium limacinum</i> ,<br><i>Cryptocodinium cohnii</i> ,<br><i>Chlorella vulgaris</i> | -                                         | Crude extracts                                               | Antioxidant<br>Cytotoxic<br>Therapeutic                | [77] |
| Ninetyone (91) microalgae strains<br>photo-tropically grown to generate<br>biomass<br>marine heterokonts<br><i>Bacillariophyte</i> cf. <i>Stauroneis</i> sp. LACW24,<br><i>Ocrophyte</i> cf. <i>Phaeothamnion</i> sp. LACW34                                          | Irish waters                              | Extracts<br>(polar solvents)                                 | Biomass generation<br>Antioxidant                      | [79] |
| <i>Chlorella</i> sp. S14                                                                                                                                                                                                                                              | -                                         | Biomass<br>Polyunsaturated<br>fatty acids (PUFA)<br>extracts | Antioxidant<br>Anti-proliferative                      | [80] |
| <b>Bacteria</b>                                                                                                                                                                                                                                                       |                                           |                                                              |                                                        |      |
| New Gram-positive<br>marine <i>Actinobacteria</i> strain                                                                                                                                                                                                              | Unexplored<br>sea sediment<br>Alang Gulf, | Extracts<br>(ethyl acetate)                                  | Antioxidant<br>Antibacterial                           | [82] |

| Source                                                                                                                   | Location of harvesting                | Extracts<br>Hydrolysates<br>Biomass                    | Biological activity<br>Potential applications                                        | Ref. |
|--------------------------------------------------------------------------------------------------------------------------|---------------------------------------|--------------------------------------------------------|--------------------------------------------------------------------------------------|------|
|                                                                                                                          | Khambhat,<br>Gujarat                  |                                                        |                                                                                      |      |
| <i>Streptomyces sp. SCS525</i>                                                                                           | Marine sediments                      | Extracts (ethyl acetate)                               | Strong antioxidant                                                                   | [83] |
| Algae associated bacteria                                                                                                | Red Sea, Jeddah,<br>Pakistan          | Extracts (ethyl acetate)<br>Secondary metabolites      | Pharmac. industry (steroids, saponins, tannins, flavonoids, anthocyanin, betacyanin) | [84] |
| <i>Bacillus Planococcus</i>                                                                                              | Saline Aushazia Lake,<br>Saudi Arabia | Saline environment                                     | Antioxidant (salinity stress enhanced)<br>Foods<br>Postbiotics                       | [85] |
| <i>Cyanobacteria Chroococcidiopsis sp. LEGE 06174</i>                                                                    | -                                     | Extracts (ethanol-PBS; acetone-PBS; methanol-PBS)      | Antioxidant<br>Antioxidant industry                                                  | [86] |
| <b>Fungi</b>                                                                                                             |                                       |                                                        |                                                                                      |      |
| <i>Aspergillus puulaauensis</i> TM124-S4                                                                                 | -                                     | Extract (water)                                        | Skin protection                                                                      | [90] |
| Sponge-associated endophytic fungi:<br><i>Tedania anhelans</i><br><i>Myxilla arenaria</i><br><i>Callyspongia fibrosa</i> | east and west coasts of India         | Sabouraud Dextrose<br>Agar Medium                      | Antioxidant<br>Anticancer<br>Anti-inflammatory                                       | [91] |
| <i>Myrothecium sp. Bzo-l062</i>                                                                                          | Deep sea                              | Extract (ethyl acetate)<br>Four new components derived | Antioxidant<br>Anti-inflammatory                                                     | [93] |
