# Supplementary material for: Recent Progress in Antioxidant Active Substances from Marine Biota
Source: MDPI journal article supplement (doi:10.3390/antiox11030439), 2022-02-22
Supplement: s1 [file s1]

**Table S2.** Substances with antioxidant activity derived from marine biota

| Substances with antioxidant activity                                                                                           | Origin                                                                                                                                                                               | Biological activity<br>Potential applications                                                                                                                              | Ref.  |
|--------------------------------------------------------------------------------------------------------------------------------|--------------------------------------------------------------------------------------------------------------------------------------------------------------------------------------|----------------------------------------------------------------------------------------------------------------------------------------------------------------------------|-------|
| <b>Antioxidant peptides</b>                                                                                                    |                                                                                                                                                                                      |                                                                                                                                                                            |       |
| Short chain hydrophobic peptides                                                                                               | Fish skin<br>Hydrolysates                                                                                                                                                            | Different<br>(dependant on the amino-acid<br>composition and sequence)                                                                                                     | [103] |
| Leu-Trp-His-Thr-His (LWHTH)                                                                                                    | <i>Styela clava</i><br>Peptic hydrolysate                                                                                                                                            | Antihypertensive<br>Functional food                                                                                                                                        | [104] |
| Peptide-reach protein hydrolysate                                                                                              | Sea cucumber, <i>A. japonicas</i><br>Peptic hydrolysate                                                                                                                              | Reducing reactive<br>oxygen species (ROS)<br>animal model                                                                                                                  | [106] |
| Swim bladder peptides                                                                                                          | Atlantic cod<br>( <i>Gadus morhua</i> )                                                                                                                                              | Antioxidant<br>Anti-aging                                                                                                                                                  | [107] |
| Peptide fractions                                                                                                              | Oyster soft tissue<br>Enzymatic hydrolysate                                                                                                                                          | Antioxidant<br>Anti-inflammatory                                                                                                                                           | [108] |
| Low molecular peptide fractions                                                                                                | Rocky Shore Crab<br>( <i>Grapsus albacarinos</i> )<br>Protein hydrolysate                                                                                                            | Antioxidant<br>Anti-cancer                                                                                                                                                 | [109] |
| <b>From byproducts and wastes</b>                                                                                              |                                                                                                                                                                                      |                                                                                                                                                                            |       |
| Biopeptides                                                                                                                    | Fish discards                                                                                                                                                                        | Health promotion<br>Alternative foods                                                                                                                                      | [110] |
| Hydrophilic peptide fraction<br>(molecular weight of 3–10 kDa,<br>sequence of twenty peptides,<br>containing 6–16 amino acids) | Red tilapia<br>( <i>Oreochromis sp.</i> )<br>ground scales<br>Enzymatic hydrolysates                                                                                                 | Antioxidant                                                                                                                                                                | [111] |
| Bioactive peptides                                                                                                             | Fish skin, bones, heads,<br>viscera<br>Enzymatic hydrolysates                                                                                                                        | Antioxidant<br>Antihypertensive<br>Anticoagulant<br>Immunomodulatory<br>Anti-spoilage<br>Modifying solubility<br>Water-holding,<br>Gelation<br>Pharmaceutical ind.<br>Food | [112] |
| <b>New discovered peptides</b>                                                                                                 |                                                                                                                                                                                      |                                                                                                                                                                            |       |
| Asn-Asp-Ala-Glu-Tyr-Gly-Ile-Cys-Gly-<br>Phe.                                                                                   | Brown-golden marine<br>microalga<br><i>Isochrysis Zhanjiangensis</i><br>Enzymatic hydrolysates<br>(chymotrypsin, trypsin,<br>pepsin) <i>in vitro</i> gastroin-<br>testinal digestion | Anti-alcohol<br>in HepG2 cells                                                                                                                                             | [113] |
| ALSTWTLQLGSTSFASPM                                                                                                             | Mackerel<br>( <i>Scomber japonicus</i> )<br>muscle<br>Protein hydrolysates                                                                                                           | Antioxidant<br>Pharmaceutical industry<br>(functional ingredients)                                                                                                         | [114] |
| Multifunctional peptides                                                                                                       | <i>Trachinus Draco</i><br>myofibrillar proteins<br>Protein hydrolysates                                                                                                              | Antioxidant<br>Metal chelating                                                                                                                                             | [115] |

| Substances with antioxidant activity                                                                                  | Origin                                                                                                                                 | Biological activity<br>Potential applications                                                                 | Ref.  |
|-----------------------------------------------------------------------------------------------------------------------|----------------------------------------------------------------------------------------------------------------------------------------|---------------------------------------------------------------------------------------------------------------|-------|
| Gly-Phe-Hyp-Gly-Ala-Asp-Gly-Val-Ala,<br>Gly-Gly-Pro-Gln-Gly-Pro-Arg,<br>Gly-Ser-Gln-Gly-Ser-Gln-Gly-Pro-Ala           | Yak ( <i>Bos grunniens</i> ) bone<br>Papain and alcalase<br>hydrolysates                                                               | Strong antioxidant                                                                                            | [116] |
| Antioxidant peptides                                                                                                  | Atlantic red seaweed<br><i>Porphyra dioica</i> <i>Conchocelis</i><br>Protease hydrolysates<br>(Prolyve® and Flavourzym combination)    | Antioxidant<br>(2.5-fold improved)                                                                            | [117] |
| Amino-acids                                                                                                           |                                                                                                                                        |                                                                                                               |       |
| Mycosporine-like amino acids (MAAs)                                                                                   | Cyanobacteria<br>and red alga                                                                                                          | Antioxidant<br>Photo-protective<br>Cosmeceutical                                                              | [119] |
| MAAs<br>Palythine<br>Porphyra-334                                                                                     | Red alga<br><i>Dulse palmaria palmata</i><br>(Usujiri, Hokkaido, Japan)<br>Water/methanol extracts                                     | Antioxidant<br>Radicals scavenging                                                                            | [118] |
| Polysaccharides                                                                                                       |                                                                                                                                        |                                                                                                               |       |
| L-Fucose                                                                                                              | Brown macro-algae<br><i>Padina gymnospora</i><br>Extracts<br>(ethanol, acetone)                                                        | High free radical scavenging                                                                                  | [124] |
| Dermatan sulphate                                                                                                     | Ascidian<br><i>Phallusia nigra</i>                                                                                                     | Antioxidant<br>Neuroprotection<br>Anti-cancer                                                                 | [125] |
| Chitosan dimers<br>(with different sequences)                                                                         | -                                                                                                                                      | <b>For the first time</b> revealed<br>sequence effect on<br>antioxidant activity                              | [126] |
| Sulphated polysaccharides                                                                                             | Brown algae<br><i>Turbinaria ornata</i><br>Hot water extracts                                                                          | Antioxidant<br>Free-radical scavenging                                                                        | [129] |
| Fucoidans                                                                                                             | Brown macro algae<br><i>Undaria pinnatifida</i> ,<br><i>Fucus vesiculosus</i><br>Extracts                                              | Topical benefits<br>(comparative <i>in vitro</i><br>and double-blind,<br>placebo-controlled clinical studies) | [130] |
| Four fucoidan fractions<br>(fucose, rhamnose, xylose, mannose,<br>glucose, and galactose<br>in different mole ratios) | Brown seaweed<br><i>Sargassum pallidum</i><br>(Yellow sea)<br>Water extracts                                                           | Pharmaceutical resource<br>Functional food                                                                    | [131] |
| Fucoidans                                                                                                             | Brown seaweeds<br><i>Sargassum ilicifolium</i> ,<br><i>Sargassum angustifolium</i><br>(Qeshm Island, Iran)<br>Extracts                 | Antioxidant<br>Antimicrobial<br>Nutraceutical industry                                                        | [40]  |
| Sulphated polysaccharides                                                                                             | brown algae<br><i>Padina boryana</i><br>(Maldives)<br>Extracts<br>(celluclast enzyme<br>assisted extraction;<br>ethanol precipitation) | Antioxidant<br>( <i>in vitro</i> and in<br>Zebrafish model <i>in vivo</i> )                                   | [132] |

| Substances with antioxidant activity                                                                                    | Origin                                                                               | Biological activity<br>Potential applications                                                                      | Ref.                    |
|-------------------------------------------------------------------------------------------------------------------------|--------------------------------------------------------------------------------------|--------------------------------------------------------------------------------------------------------------------|-------------------------|
| Fucoidan<br>(sulfated polysaccharides<br>and small amounts<br>galactose, xylose, glucose, and mannose)                  | Brown seaweed<br><i>Sargassum filipendula</i><br>Extracts                            | Free radical scavenging<br>(dependent on the extraction<br>method, temperature, time<br>and solvent concentration) | [133]                   |
| A-Carrageenan                                                                                                           | Red algae<br><i>Saccharina japonica</i><br>Extracts                                  | Anti-coronaviruses                                                                                                 | [138]<br>[139]<br>[140] |
| New sulphated polysaccharides                                                                                           | Red algae<br><i>Gracilaria caudate</i> (SP-Gc)<br>Enzymatic extraction               | Antioxidant<br>Hydrocolloids                                                                                       | [141]                   |
| Sulphated polysaccharides,<br>(molar ratio galactose:3,6-anhydro-galac-<br>tose = 1.2:1.0; sulphate content about 3.8%) | Alga<br><i>Porphyra haitanensis</i>                                                  | Radical scavenging                                                                                                 | [142]                   |
| <b>Terpens</b>                                                                                                          |                                                                                      |                                                                                                                    |                         |
| New scalarane-type<br>sester-terpenes:<br>hyrtioscalarane A<br>hyrtioscalaren B                                         | Demosponge<br><i>Hyrtios erectus</i><br>Organic extracts                             | Antioxidant<br>Anti-inflammatory<br>(selectivity index<br>higher than that<br>of Ibuprofen)                        | [143]                   |
| Monoterpenoid (–)-Loliolide                                                                                             | seaweed<br><i>Sargassum horneri</i>                                                  | Antioxidant<br>(at Vero cells and<br>in Zebrafish models)                                                          | [144]                   |
| Thyrsiferol                                                                                                             | red algae<br>genus <i>Laurencia</i>                                                  | Anti-viral<br>Anti-tumour                                                                                          | [49]                    |
| Carotenoid<br>Astaxanthin (red pigment)                                                                                 | -                                                                                    | Antioxidant<br>(10-fold greater than<br>other carotenoids)                                                         | [146]                   |
| Saproxanthin<br>Myxol<br>(rare marine monocyclic carotenoids)                                                           | Bacteria<br>family <i>Flavobacteriaceae</i>                                          | Antioxidant<br>(stronger than of<br>Zeaxanthin and $\beta$ -carotene)                                              | [147]                   |
| <b>Polyphenols</b>                                                                                                      |                                                                                      |                                                                                                                    |                         |
| Bromophenols<br>Phenolic acids<br>Flavonoids<br>Florotannins                                                            | -                                                                                    | Antioxidant<br>(on different mechanisms)<br>Singlet oxygen and<br>free radicals scavenging<br>Chelating            | [151]                   |
| Ovothiols<br>(thiol histidine derivatives)                                                                              | Synthesized<br>by two enzymes:<br>sulfoxide synthase OvoA,<br>sulfoxide lyase Ovo B. | Unusual antioxidant<br>Anti-proliferative<br>Anti-fibrotic                                                         | [153]                   |
| <b>Enzymatic antioxidants</b>                                                                                           |                                                                                      |                                                                                                                    |                         |
| Recombinant superoxide dismutase<br>metallo-enzyme                                                                      | Pacific abalone<br><i>Haliotis discus hannai</i> Ino<br>( <i>P. pastoris</i> )       | Antioxidant<br>Endogenous,<br>Exogenous<br>free radicals scavenging                                                | [155]                   |
| New digestive $\alpha$ -amylase                                                                                         | Blue Crab<br><i>Portunus segnis</i><br>Viscera                                       | New features<br>(compared to other<br>marine-derived enzymes)                                                      | [157]                   |

| Substances with antioxidant activity | Origin | Biological activity             | Ref. |
|--------------------------------------|--------|---------------------------------|------|
|                                      |        | Potential applications          |      |
|                                      |        | Oat flour antioxidant potential |      |
